# Supplementary material for: Recessive aminoacyl-tRNA synthetase disorders: lessons learned from in vivo disease models
Source: Frontiers journal article supplement (doi:10.3389/fnins.2023.1182874), 2023-05-09
Supplement: Table_2.DOCX [file Table_2.DOCX]

**Supplementary Table 2. Diseases caused by recessive mutations in mitochondrial ARSs and associated animal studies.** Some mouse ARS knockout models were generated and phenotyped by the International Mouse Phenotyping Consortium (IMPC), with data available at [www.mousephenotype.org](http://www.mousephenotype.org). Note that in *C. elegans*, the genes corresponding to the mitochondrial alanyl- and valyl-tRNA synthetase genes are *aars-1* and *vars-1*. Other *C.* *elegans* genes follow the standard pattern of nomenclature, where cytoplasmic and bifunctional ARS genes are assigned the suffix *-1* and mitochondrial genes are assigned the suffix *-2*.

| **Human ARS gene** | **Clinical presentation(s)** | **Animal studies and disease models** |
| --- | --- | --- |
| *AARS2* | - Combined oxidative phosphorylation deficiency 8 [OMIM #614096]; (Gotz et al., 2011; Taylor et al., 2014; Mazurova et al., 2017; Sommerville et al., 2019; Nielsen et al., 2020; van Helden et al., 2021) - Progressive leukoencephalopathy with ovarian failure [OMIM #615889] (Dallabona et al., 2014; Zhou et al., 2019; Fan et al., 2022) - Leukodystrophy without ovarian failure (Sun et al., 2017; Srivastava et al., 2019; Wang et al., 2019; Axelsen et al., 2021) - Early-onset epileptic encephalopathy with hypomyelination (Simons et al., 2015; Nakayama et al., 2017) - Adult-onset leukoencephalopathy with axonal spheroids and pigmented glia *(prev. known as hereditary diffuse leukoencephalopathy with axonal spheroids (HDLS) or pigmentary orthochromatic leukodystrophy (POLD))* (Lynch et al., 2016; Taglia et al., 2018) - Primary pulmonary hypoplasia (Kiraly-Borri et al., 2019) - Ataxia without leukoencephalopathy (Srivastava et al., 2019; Kuo et al., 2020; Okamoto et al., 2022) - Retinopathy and optic atrophy (Peragallo et al., 2018) | ***C. elegans***   - RNAi *aars-1* knockdown (Zheng et al., 2022a)   **Mouse (*Mus musculus*)**   - Introduction of editing defective *Aars2* variants (Hilander et al., 2018) - *Aars2* knockout (IMPC data) (Dickinson et al., 2016) |
| *CARS2* | - Combined oxidative phosphorylation deficiency 27 [OMIM #616672] (Hallmann et al., 2014; Coughlin et al., 2015; Samanta et al., 2018; Kapoor et al., 2021; Li et al., 2021b) | ***C. elegans***   - RNAi bifunctional *cars-1* knockdown (Zheng et al., 2022a)   **Zebrafish (*Danio rerio*)**   - Morpholino *cars2* knockdown (Wang et al., 2015)   **Mouse (*Mus musculus*)**   - Homozygous and heterozygous *Cars2* knockout (Akaike et al., 2017) |
| *DARS2* | - Leukoencephalopathy with brain stem and spinal cord involvement and lactate elevation; LBSL [OMIM #611105] (van der Knaap et al., 2003; Petzold et al., 2006; Scheper et al., 2007; Uluc et al., 2008; Isohanni et al., 2010; Lin et al., 2010; Labauge et al., 2011; Mierzewska et al., 2011; Miyake et al., 2011; Orcesi et al., 2011; Sharma et al., 2011; Steenweg et al., 2011; Synofzik et al., 2011; Steenweg et al., 2012b; Tzoulis et al., 2012; Cheng et al., 2013; Martikainen et al., 2013; Yamashita et al., 2013; Tylki-Szymanska et al., 2014; van Berge et al., 2014; Köhler et al., 2015; Lan et al., 2017; Çavuşoğlu et al., 2018; Yahia et al., 2018; Lin et al., 2019; Yelam et al., 2019; Al Balushi et al., 2020; Felhi et al., 2020; Yazici Gencdal et al., 2020; Axelsen et al., 2021; Li et al., 2021c; Ngo et al., 2021; Roux et al., 2021; Stellingwerff et al., 2021; Wongkittichote et al., 2022) | ***C. elegans***   - RNAi *dars-2* knockdown (Zheng et al., 2022a)   **Mouse (*Mus musculus*)**   - Conditional *Dars2* knockout in neurons (Aradjanski et al., 2017; Nemeth et al., 2020; Rumyantseva et al., 2020) - Conditional *Dars2* knockout in oligodendrocytes (Aradjanski et al., 2017) - Conditional *Dars2* knockout in heart and skeletal muscle (Dogan et al., 2014) - Heterozygous and homozygous *Dars2* knockout (Dickinson et al., 2016; Aradjanski et al., 2017) |
| *EARS2* | - Leukoencephalopathy With Thalamus and Brainstem Involvement and High Lactate; LTBL [OMIM #614924] (Steenweg et al., 2012a; Biancheri et al., 2015; Danhauser et al., 2016; Güngör et al., 2016; Kevelam et al., 2016; Şahin et al., 2016; Taskin et al., 2016; Oliveira et al., 2017; Sellars et al., 2017; Al Balushi et al., 2020; Barbosa-Gouveia et al., 2020; Felhi et al., 2020; Ni et al., 2021; Roux et al., 2021; Sawada et al., 2021) | ***C. elegans***   - RNAi *ears-2* knockdown (Zheng et al., 2022a)   **Mouse (*Mus musculus*)**   - *Ears2* knockout (IMPC data) (Dickinson et al., 2016) |
| *FARS2* | - Combined oxidative phosphorylation deficiency 14 [OMIM #613658]; mitochondrial encephalopathy (Elo et al., 2012; Shamseldin et al., 2012; Almalki et al., 2014; Vernon et al., 2015; Walker et al., 2016; Almannai et al., 2018; Ville et al., 2020; Barcia et al., 2021b; Guerrero and Bhatia, 2021; Li et al., 2021b; Roux et al., 2021) - Juvenile onset refractory epilepsy (Hotait et al., 2020) - Autosomal recessive spastic paraplegia 77 [OMIM #617046] (Raviglione et al., 2016; Yang et al., 2016; Vantroys et al., 2017; Almannai et al., 2018; Forman et al., 2019; Meszarosova et al., 2020) | ***C. elegans***   - RNAi *fars-2* knockdown (Zheng et al., 2022a)   ***Drosophila melanogaster***   - *PheRS-m* knockout using CRISPR/Cas9 (Fan et al., 2021) - RNAi *PheRS-m* knockdown (Fan et al., 2021) - Introduction of loss-of-function missense mutations into *PheRS-m* (Mo et al., 2023)   **Zebrafish (*Danio rerio*)**   - Morpholino *fars2* knockdown (Li et al., 2021a; Chen et al., 2022)   **Mouse (*Mus musculus*)**   - *Fars2* knockout (IMPC data) (Dickinson et al., 2016) - Introduction of human patient mutation into *Fars2* (Chen et al., 2022) - *Fars2 knockout using CRISPR/Cas9* (Chen et al., 2022) - Conditional *Fars2* knockout in neurons (Chen et al., 2022) |
| *HARS2* | - Perrault Syndrome 2 [OMIM #614926] (Pierce et al., 2011; Lerat et al., 2016; Demain et al., 2020; Yu et al., 2020; Zou et al., 2020; Souissi et al., 2021) | ***C. elegans***   - RNAi bifunctional *hars-1* knockdown (Pierce et al., 2011; Zheng et al., 2022a)   **Zebrafish (*Danio rerio*)**   - Morpholino knockdown of bifunctional *hars1* (Waldron et al., 2019) - *hars1* variants identified in mutagenesis screen for genes important for early development (Amsterdam et al., 2004)   **Mouse (*Mus musculus*)**   - Conditional *Hars2* knockout in hair cells (Xu et al., 2021) - *Hars2* knockout (IMPC data) (Dickinson et al., 2016) |
| *IARS2* | - Cataracts, growth hormone deficiency, sensory neuropathy, sensorineural hearing loss, and skeletal dysplasia; CAGSSS [OMIM #616007] (Liberfarb et al., 1993; Schwartzentruber et al., 2014; Jabbour and Harissi-Dagher, 2016; Moosa et al., 2017; Vona et al., 2018; Lee et al., 2020) - Leigh syndrome, West syndrome & CAGSSS (Takezawa et al., 2018) - Infantile spasms, Leigh disease and Wolff-Parkinson White pattern (Upadia et al., 2022) - Sideroblastic anemia (Barcia et al., 2021a; Gong et al., 2022), with hypoparathyroidism (Gong et al., 2022) | ***C. elegans***   - RNAi *iars-2* knockdown (Zheng et al., 2022a)   **Mouse (*Mus musculus*)**   - *Iars2* knockout (IMPC data) (Dickinson et al., 2016) |
| *LARS2* | - Hydrops, lactic acidosis, and sideroblastic anemia; HLASA [OMIM #617021] (Riley et al., 2016; Riley et al., 2020) - Perrault syndrome 4 [OMIM #615300] (Pierce et al., 2013; Lerat et al., 2016; Soldà et al., 2016; Demain et al., 2017; Kosaki et al., 2018; Al-Jaroudi et al., 2019; van der Knaap et al., 2019; Carminho-Rodrigues et al., 2020; Pan et al., 2020; Riley et al., 2020; Tucker et al., 2020; Buonfiglio et al., 2022; Sun et al., 2022) - Premature ovarian insufficiency without hearing loss (Neyroud et al., 2022) - Reversible mitochondrial myopathy, lactic acidosis and developmental delay (Riley et al., 2020) | ***C. elegans***   - Expression of protein-truncating *lars-2* variant (Pierce et al., 2013) - *lars-2* variant identified in genetic screen for genes affecting *C. elegans* lifespan (Lee et al., 2003) - RNAi *lars-2* knockdown (Zheng et al., 2022a) |
| *MARS2* | - Combined oxidative phosphorylation deficiency 25 [OMIM #616430] (Webb et al., 2015) - Autosomal recessive spastic ataxia with leukoencephalopathy; ARSAL [OMIM #611390] (Thiffault et al., 2006; Bayat et al., 2012) | ***C. elegans***   - RNAi bifunctional *mars-1* knockdown (Zheng et al., 2022a)   ***Drosophila melanogaster***   - *MetRS-m* variant identified in a forward genetic screen causing photoreceptor neuron degeneration (Bayat et al., 2012)   **Mouse (*Mus musculus*)**   - *Mars2* knockout (Dickinson et al., 2016; Cheong et al., 2020) |
| *NARS2* | - Autosomal recessive deafness 94; DFNB94 [OMIM #618434] (Simon et al., 2015; Al-Sharif et al., 2022) - Combined oxidative phosphorylation deficiency 24 [OMIM #616239], Alpers syndrome, Leigh syndrome (Simon et al., 2015; Sofou et al., 2015; Vanlander et al., 2015; Mizuguchi et al., 2017; Seaver et al., 2018; Lee et al., 2020; Li et al., 2021b; Sofou et al., 2021; Štěrbová et al., 2021; Ait-El-Mkadem Saadi et al., 2022; Cokyaman et al., 2022; Hu et al., 2022; Tanaka et al., 2022; Vafaee-Shahi et al., 2022; Yang et al., 2022b; Kistol et al., 2023) - Developmental delay, epilepsy, and neonatal diabetes (Yagasaki et al., 2022) | ***C. elegans***   - RNAi *nars-2* knockdown (Zheng et al., 2022a)   **Mouse (*Mus musculus*)**   - *Nars2* knockout (Dickinson et al., 2016; Cheong et al., 2020) |
| *PARS2* | - Developmental and epileptic encephalopathy 75; DEE75 [OMIM #618437], Alpers syndrome (Sofou et al., 2012; Sofou et al., 2015; Mizuguchi et al., 2017; Ciara et al., 2018; Yin et al., 2018; Al Balushi et al., 2020; M et al., 2020; Li et al., 2021b; Okamoto et al., 2022) | ***C. elegans***   - RNAi *pars-2* knockdown (Zheng et al., 2022a) |
| *RARS2* | - Fatal infantile encephalopathy with mitochondrial respiratory chain defects (Pontocerebellar Hypoplasia, Type 6 (PCH6)) [OMIM #611523] (Edvardson et al., 2007; Rankin et al., 2010; Namavar et al., 2011; Glamuzina et al., 2012; Cassandrini et al., 2013; Joseph et al., 2014; Li et al., 2015; Alkhateeb et al., 2016; Ngoh et al., 2016; Al Balushi et al., 2020; Nevanlinna et al., 2020; Roux et al., 2021; de Valles-Ibáñez et al., 2022; Nuovo et al., 2022; Zhang et al., 2022) - Epileptic encephalopathy without pontocerebellar hypoplasia (atypical PCH6) (Kastrissianakis et al., 2013; Lühl et al., 2016; Nishri et al., 2016; van Dijk et al., 2017; Mathew et al., 2018; Zhang et al., 2018; Minardi et al., 2020; Xu et al., 2020) - PCH6 with cardiomyopathy, hydrops and pulmonary hypoplasia (Lax et al., 2015) - PCH6 with liver involvement (Sevinç et al., 2022) | ***C. elegans***   - RNAi *rars-2* knockdown (Zheng et al., 2022a)   **Zebrafish (*Danio rerio)***   - Morpholino *rars2* knockdown (Kasher et al., 2011)   **Mouse (*Mus musculus*)**   - *Rars2* knockout (IMPC data) (Dickinson et al., 2016) |
| *SARS2* | - Hyperuricemia, pulmonary hypertension, renal failure, and alkalosis (HUPRA syndrome) [OMIM #613845] (Belostotsky et al., 2011; Rivera et al., 2013; Zhou et al., 2021; Göknar et al., 2022; Yang et al., 2022a) - Progressive spastic paresis (Linnankivi et al., 2016) - HUPRA and progressive spastic paresis with seizures (Yu et al., 2022) - Congenital sideroblastic anemia (Colin et al., 2021) | ***C. elegans***   - RNAi *sars-2* knockdown (Zheng et al., 2022a)   ***Drosophila melanogaster***   - RNAi *SerRS-m* knockdown (Guitart et al., 2013)   **Mouse (*Mus musculus*)**   - *Sars2* expression and localization data (Gibbons et al., 2004) - Introduction of human patient variants into *Sars2* (Yu et al., 2022) |
| *TARS2* | - Combined oxidative phosphorylation deficiency 21 [OMIM #615918] (Diodato et al., 2014; Li et al., 2020; Gao et al., 2022; Zheng et al., 2022b; He et al., 2023) | ***C. elegans***   - RNAi bifunctional *tars-1* knockdown (Zheng et al., 2022a)   **Mouse (*Mus musculus*)**   - *Tars2* knockout (IMPC data) (Dickinson et al., 2016) |
| *VARS2* | - Combined oxidative phosphorylation deficiency 20 [OMIM #615917] (Diodato et al., 2014; Taylor et al., 2014; Baertling et al., 2017; Bruni et al., 2018; Ma et al., 2018; Pereira et al., 2018; Begliuomini et al., 2019; Chin et al., 2019; Ruzman et al., 2019; Kušíková et al., 2021; Wu et al., 2022) - Epilepsy, mental retardation, short stature, growth hormone deficiency and hypogonadism (Alsemari et al., 2017) | ***C. elegans***   - RNAi *vars-1* knockdown (Zheng et al., 2022a)   **Zebrafish (*Danio rerio*)**   - Morpholino *vars2* knockdown (Kayvanpour et al., 2022)   **Mouse (*Mus musculus*)**   - *Vars2* knockout (IMPC data) (Dickinson et al., 2016) |
| *WARS2* | - Mitochondrial neurodevelopmental disorder, with abnormal movements and lactic acidosis, with or without seizures; NEMMLAS [OMIM #617710] (Theisen et al., 2017; Wortmann et al., 2017; Vantroys et al., 2018; Maffezzini et al., 2019; Virdee et al., 2019; Ilinca et al., 2022) - Childhood-onset Parkinsonism-dystonia 3; PKDYS3 [OMIM #619738] (Burke et al., 2018; Martinelli et al., 2020; Ilinca et al., 2022; Skorvanek et al., 2022) - Hyperkinetic movement disorder (Hübers et al., 2020) - Intellectual disability, ataxia and athetosis (Musante et al., 2017) | ***C. elegans***   - RNAi *wars-2* knockdown (Zheng et al., 2022a)   ***Drosophila melanogaster***   - RNAi *TrpRS-m* silencing (Maffezzini et al., 2019)   **Zebrafish (*Danio rerio*)**   - Morpholino *wars2* knockdown (Wang et al., 2016)   **Rat (*Rattus norvegicus*)**   - Heterozygous and homozygous *Wars2* knockout with zinc finger nuclease (Wang et al., 2016) - *Wars2* variant (p.L53F) identified through linkage analysis with effects on metabolism and coronary blood flow (Wang et al., 2016; Pravenec et al., 2017)   **Mouse (*Mus musculus*)**   - *Wars2* knockout (IMPC data) (Dickinson et al., 2016) - *Wars2* variant identified in a mutagenesis screen causing age-related hearing loss (Potter et al., 2016) - *Wars2* variant identified in mutagenesis screen causing hearing loss and metabolic changes (Agnew et al., 2018; Mušo et al., 2022) |
| *YARS2* | - Myopathy, lactic acidosis, and sideroblastic anemia 2; MLASA2 [OMIM #613561] (Riley et al., 2010; Sasarman et al., 2012; Riley et al., 2013; Shahni et al., 2013; Nakajima et al., 2014; Ardissone et al., 2015; Sommerville et al., 2017; Riley et al., 2018; Smith et al., 2018; Carreño-Gago et al., 2021; Roux et al., 2021; Rudaks et al., 2022) | ***C. elegans***   - RNAi *yars-2* knockdown (Zheng et al., 2022a)   ***Drosophila melanogaster***   - Interaction between *TyrRS-m* mutation and a mutation in mtDNA-encoded tyrosine tRNA (Meiklejohn et al., 2013; Holmbeck et al., 2015)   **Zebrafish (*Danio rerio*)**   - *yars2* knockout using CRISPR/Cas9 (Jin et al., 2021)   **Dog (*Canis lupus familiaris*)**   - Identification of missense *Yars2* variant causing cardiomyopathy and juvenile mortality (Gurtner et al., 2020) |

**References**

Agnew, T., Goldsworthy, M., Aguilar, C., Morgan, A., Simon, M., Hilton, H., et al. (2018). A Wars2 Mutant Mouse Model Displays OXPHOS Deficiencies and Activation of Tissue-Specific Stress Response Pathways. *Cell Rep* 25(12)**,** 3315-3328.e3316. doi: 10.1016/j.celrep.2018.11.080.

Ait-El-Mkadem Saadi, S., Kaphan, E., Morales Jaurrieta, A., Fragaki, K., Chaussenot, A., Bannwarth, S., et al. (2022). Splicing variants in NARS2 are associated with milder phenotypes and intra-familial variability. *Eur J Med Genet* 65(12)**,** 104643. doi: 10.1016/j.ejmg.2022.104643.

Akaike, T., Ida, T., Wei, F.Y., Nishida, M., Kumagai, Y., Alam, M.M., et al. (2017). Cysteinyl-tRNA synthetase governs cysteine polysulfidation and mitochondrial bioenergetics. *Nat Commun* 8(1)**,** 1177. doi: 10.1038/s41467-017-01311-y.

Al Balushi, A., Matviychuk, D., Jobling, R., Salomons, G.S., Blaser, S., and Mercimek-Andrews, S. (2020). Phenotypes and genotypes of mitochondrial aminoacyl-tRNA synthetase deficiencies from a single neurometabolic clinic. *JIMD Rep* 51(1)**,** 3-10. doi: 10.1002/jmd2.12079.

Al-Jaroudi, D., Enabi, S., and AlThagafi, M.S. (2019). Perrault syndrome with amenorrhea, infertility, Tarlov cyst, and degenerative disc. *Gynecol Endocrinol* 35(12)**,** 1037-1039. doi: 10.1080/09513590.2019.1637407.

Al-Sharif, F., Alsadeq, H., Rozan, A., Halabi, M.B., Badwilan, H., Mohammed, A.A., et al. (2022). Bilateral Nonsyndromic Sensorineural Hearing Loss Caused by a NARS2 Mutation. *Cureus* 14(11)**,** e31467. doi: 10.7759/cureus.31467.

Alkhateeb, A.M., Aburahma, S.K., Habbab, W., and Thompson, I.R. (2016). Novel mutations in WWOX, RARS2, and C10orf2 genes in consanguineous Arab families with intellectual disability. *Metab Brain Dis* 31(4)**,** 901-907. doi: 10.1007/s11011-016-9827-9.

Almalki, A., Alston, C.L., Parker, A., Simonic, I., Mehta, S.G., He, L., et al. (2014). Mutation of the human mitochondrial phenylalanine-tRNA synthetase causes infantile-onset epilepsy and cytochrome c oxidase deficiency. *Biochim Biophys Acta* 1842(1)**,** 56-64. doi: 10.1016/j.bbadis.2013.10.008.

Almannai, M., Wang, J., Dai, H., El-Hattab, A.W., Faqeih, E.A., Saleh, M.A., et al. (2018). FARS2 deficiency; new cases, review of clinical, biochemical, and molecular spectra, and variants interpretation based on structural, functional, and evolutionary significance. *Mol Genet Metab* 125(3)**,** 281-291. doi: 10.1016/j.ymgme.2018.07.014.

Alsemari, A., Al-Younes, B., Goljan, E., Jaroudi, D., BinHumaid, F., Meyer, B.F., et al. (2017). Recessive VARS2 mutation underlies a novel syndrome with epilepsy, mental retardation, short stature, growth hormone deficiency, and hypogonadism. *Hum Genomics* 11(1)**,** 28. doi: 10.1186/s40246-017-0124-4.

Amsterdam, A., Nissen, R.M., Sun, Z., Swindell, E.C., Farrington, S., and Hopkins, N. (2004). Identification of 315 genes essential for early zebrafish development. *Proc Natl Acad Sci U S A* 101(35)**,** 12792-12797. doi: 10.1073/pnas.0403929101.

Aradjanski, M., Dogan, S.A., Lotter, S., Wang, S., Hermans, S., Wibom, R., et al. (2017). DARS2 protects against neuroinflammation and apoptotic neuronal loss, but is dispensable for myelin producing cells. *Hum Mol Genet* 26(21)**,** 4181-4189. doi: 10.1093/hmg/ddx307.

Ardissone, A., Lamantea, E., Quartararo, J., Dallabona, C., Carrara, F., Moroni, I., et al. (2015). A Novel Homozygous YARS2 Mutation in Two Italian Siblings and a Review of Literature. *JIMD Rep* 20**,** 95-101. doi: 10.1007/8904_2014_397.

Axelsen, T.M., Vammen, T.L., Bak, M., Pourhadi, N., Stenør, C.M., and Grønborg, S. (2021). Case report: 'AARS2 leukodystrophy'. *Mol Genet Metab Rep* 28**,** 100782. doi: 10.1016/j.ymgmr.2021.100782.

Baertling, F., Alhaddad, B., Seibt, A., Budaeus, S., Meitinger, T., Strom, T.M., et al. (2017). Neonatal encephalocardiomyopathy caused by mutations in VARS2. *Metab Brain Dis* 32(1)**,** 267-270. doi: 10.1007/s11011-016-9890-2.

Barbosa-Gouveia, S., González-Vioque, E., Hermida, Á., Suarez, M.U., Martínez-González, M.J., Borges, F., et al. (2020). Identification of a Novel Variant in EARS2 Associated with a Severe Clinical Phenotype Expands the Clinical Spectrum of LTBL. *Genes (Basel)* 11(9). doi: 10.3390/genes11091028.

Barcia, G., Pandithan, D., Ruzzenente, B., Assouline, Z., Pennisi, A., Ormieres, C., et al. (2021a). Biallelic IARS2 mutations presenting as sideroblastic anemia. *Haematologica* 106(4)**,** 1220-1225. doi: 10.3324/haematol.2020.270710.

Barcia, G., Rio, M., Assouline, Z., Zangarelli, C., Roux, C.J., de Lonlay, P., et al. (2021b). Novel FARS2 variants in patients with early onset encephalopathy with or without epilepsy associated with long survival. *Eur J Hum Genet* 29(3)**,** 533-538. doi: 10.1038/s41431-020-00757-x.

Bayat, V., Thiffault, I., Jaiswal, M., Tetreault, M., Donti, T., Sasarman, F., et al. (2012). Mutations in the mitochondrial methionyl-tRNA synthetase cause a neurodegenerative phenotype in flies and a recessive ataxia (ARSAL) in humans. *PLoS Biol* 10(3)**,** e1001288. doi: 10.1371/journal.pbio.1001288.

Begliuomini, C., Magli, G., Di Rocco, M., Santorelli, F.M., Cassandrini, D., Nesti, C., et al. (2019). VARS2-linked mitochondrial encephalopathy: two case reports enlarging the clinical phenotype. *BMC Med Genet* 20(1)**,** 77. doi: 10.1186/s12881-019-0798-7.

Belostotsky, R., Ben-Shalom, E., Rinat, C., Becker-Cohen, R., Feinstein, S., Zeligson, S., et al. (2011). Mutations in the mitochondrial seryl-tRNA synthetase cause hyperuricemia, pulmonary hypertension, renal failure in infancy and alkalosis, HUPRA syndrome. *Am J Hum Genet* 88(2)**,** 193-200. doi: 10.1016/j.ajhg.2010.12.010.

Biancheri, R., Lamantea, E., Severino, M., Diodato, D., Pedemonte, M., Cassandrini, D., et al. (2015). Expanding the Clinical and Magnetic Resonance Spectrum of Leukoencephalopathy with Thalamus and Brainstem Involvement and High Lactate (LTBL) in a Patient Harboring a Novel EARS2 Mutation. *JIMD Rep* 23**,** 85-89. doi: 10.1007/8904_2015_434.

Bruni, F., Di Meo, I., Bellacchio, E., Webb, B.D., McFarland, R., Chrzanowska-Lightowlers, Z.M.A., et al. (2018). Clinical, biochemical, and genetic features associated with VARS2-related mitochondrial disease. *Hum Mutat* 39(4)**,** 563-578. doi: 10.1002/humu.23398.

Buonfiglio, P.I., Bruque, C.D., Lotersztein, V., Luce, L., Giliberto, F., Menazzi, S., et al. (2022). Predicting pathogenicity for novel hearing loss mutations based on genetic and protein structure approaches. *Sci Rep* 12(1)**,** 301. doi: 10.1038/s41598-021-04081-2.

Burke, E.A., Frucht, S.J., Thompson, K., Wolfe, L.A., Yokoyama, T., Bertoni, M., et al. (2018). Biallelic mutations in mitochondrial tryptophanyl-tRNA synthetase cause Levodopa-responsive infantile-onset Parkinsonism. *Clin Genet* 93(3)**,** 712-718. doi: 10.1111/cge.13172.

Carminho-Rodrigues, M.T., Klee, P., Laurent, S., Guipponi, M., Abramowicz, M., Cao-van, H., et al. (2020). LARS2-Perrault syndrome: a new case report and literature review. *BMC Med Genet* 21(1)**,** 109. doi: 10.1186/s12881-020-01028-8.

Carreño-Gago, L., Juárez-Flores, D.L., Grau, J.M., Ramón, J., Lozano, E., Vila-Julià, F., et al. (2021). Two Novel Variants in YARS2 Gene Are Responsible for an Extended MLASA Phenotype with Pancreatic Insufficiency. *J Clin Med* 10(16). doi: 10.3390/jcm10163471.

Cassandrini, D., Cilio, M.R., Bianchi, M., Doimo, M., Balestri, M., Tessa, A., et al. (2013). Pontocerebellar hypoplasia type 6 caused by mutations in RARS2: definition of the clinical spectrum and molecular findings in five patients. *J Inherit Metab Dis* 36(1)**,** 43-53. doi: 10.1007/s10545-012-9487-9.

Çavuşoğlu, D., Olgaç-Dündar, N., Öztekin, Ö., Özdemir, T.R., Arıcan, P., and Gençpınar, P. (2018). The first pediatric case of leukoencephalopathy with brainstem and spinal cord involvement and lactate elevation (LBSL) from Turkey. *Turk J Pediatr* 60(2)**,** 216-220x. doi: 10.24953/turkjped.2018.02.018.

Chen, X., Liu, F., Li, B., Wang, Y., Yuan, L., Yin, A., et al. (2022). Neuropathy-associated Fars2 deficiency affects neuronal development and potentiates neuronal apoptosis by impairing mitochondrial function. *Cell Biosci* 12(1)**,** 103. doi: 10.1186/s13578-022-00838-y.

Cheng, F.B., Shen, P.P., Zhou, H.W., Meng, H.M., Yang, Y., and Feng, J.C. (2013). Adult-onset leukoencephalopathy with brain stem and spinal cord involvement in Chinese Han population: a case report and literature review. *Neurol India* 61(2)**,** 161-163. doi: 10.4103/0028-3886.111123.

Cheong, A., Archambault, D., Degani, R., Iverson, E., Tremblay, K.D., and Mager, J. (2020). Nuclear-encoded mitochondrial ribosomal proteins are required to initiate gastrulation. *Development* 147(10). doi: 10.1242/dev.188714.

Chin, H.L., Goh, D.L., Wang, F.S., Tay, S.K.H., Heng, C.K., Donnini, C., et al. (2019). A combination of two novel VARS2 variants causes a mitochondrial disorder associated with failure to thrive and pulmonary hypertension. *J Mol Med (Berl)* 97(11)**,** 1557-1566. doi: 10.1007/s00109-019-01834-5.

Ciara, E., Rokicki, D., Lazniewski, M., Mierzewska, H., Jurkiewicz, E., Bekiesińska-Figatowska, M., et al. (2018). Clinical and molecular characteristics of newly reported mitochondrial disease entity caused by biallelic PARS2 mutations. *J Hum Genet* 63(4)**,** 473-485. doi: 10.1038/s10038-017-0401-z.

Cokyaman, T., Cetin, H., Dogan, D., and Silan, F. (2022). A new entity in the NARS2 variant: the first reported case of type 1 diabetes mellitus associated with the phenotype. *J Trop Pediatr* 69(1). doi: 10.1093/tropej/fmac108.

Colin, E., Courtois, G., Brouzes, C., Pulman, J., Rabant, M., Rötig, A., et al. (2021). Biallelic mutations in the SARS2 gene presenting as congenital sideroblastic anemia. *Haematologica* 106(12)**,** 3202-3205. doi: 10.3324/haematol.2021.279138.

Coughlin, C.R., 2nd, Scharer, G.H., Friederich, M.W., Yu, H.C., Geiger, E.A., Creadon-Swindell, G., et al. (2015). Mutations in the mitochondrial cysteinyl-tRNA synthase gene, CARS2, lead to a severe epileptic encephalopathy and complex movement disorder. *J Med Genet* 52(8)**,** 532-540. doi: 10.1136/jmedgenet-2015-103049.

Dallabona, C., Diodato, D., Kevelam, S.H., Haack, T.B., Wong, L.J., Salomons, G.S., et al. (2014). Novel (ovario) leukodystrophy related to AARS2 mutations. *Neurology* 82(23)**,** 2063-2071. doi: 10.1212/WNL.0000000000000497.

Danhauser, K., Haack, T.B., Alhaddad, B., Melcher, M., Seibt, A., Strom, T.M., et al. (2016). EARS2 mutations cause fatal neonatal lactic acidosis, recurrent hypoglycemia and agenesis of corpus callosum. *Metab Brain Dis* 31(3)**,** 717-721. doi: 10.1007/s11011-016-9793-2.

de Valles-Ibáñez, G., Hildebrand, M.S., Bahlo, M., King, C., Coleman, M., Green, T.E., et al. (2022). Infantile-onset myoclonic developmental and epileptic encephalopathy: A new RARS2 phenotype. *Epilepsia Open* 7(1)**,** 170-180. doi: 10.1002/epi4.12553.

Demain, L.A., Urquhart, J.E., O'Sullivan, J., Williams, S.G., Bhaskar, S.S., Jenkinson, E.M., et al. (2017). Expanding the genotypic spectrum of Perrault syndrome. *Clin Genet* 91(2)**,** 302-312. doi: 10.1111/cge.12776.

Demain, L.A.M., Gerkes, E.H., Smith, R.J.H., Molina-Ramirez, L.P., O'Keefe, R.T., and Newman, W.G. (2020). A recurrent missense variant in HARS2 results in variable sensorineural hearing loss in three unrelated families. *J Hum Genet* 65(3)**,** 305-311. doi: 10.1038/s10038-019-0706-1.

Dickinson, M.E., Flenniken, A.M., Ji, X., Teboul, L., Wong, M.D., White, J.K., et al. (2016). High-throughput discovery of novel developmental phenotypes. *Nature* 537(7621)**,** 508-514. doi: 10.1038/nature19356.

Diodato, D., Melchionda, L., Haack, T.B., Dallabona, C., Baruffini, E., Donnini, C., et al. (2014). VARS2 and TARS2 mutations in patients with mitochondrial encephalomyopathies. *Hum Mutat* 35(8)**,** 983-989. doi: 10.1002/humu.22590.

Dogan, S.A., Pujol, C., Maiti, P., Kukat, A., Wang, S., Hermans, S., et al. (2014). Tissue-specific loss of DARS2 activates stress responses independently of respiratory chain deficiency in the heart. *Cell Metab* 19(3)**,** 458-469. doi: 10.1016/j.cmet.2014.02.004.

Edvardson, S., Shaag, A., Kolesnikova, O., Gomori, J.M., Tarassov, I., Einbinder, T., et al. (2007). Deleterious mutation in the mitochondrial arginyl-transfer RNA synthetase gene is associated with pontocerebellar hypoplasia. *Am J Hum Genet* 81(4)**,** 857-862. doi: 10.1086/521227.

Elo, J.M., Yadavalli, S.S., Euro, L., Isohanni, P., Götz, A., Carroll, C.J., et al. (2012). Mitochondrial phenylalanyl-tRNA synthetase mutations underlie fatal infantile Alpers encephalopathy. *Hum Mol Genet* 21(20)**,** 4521-4529. doi: 10.1093/hmg/dds294.

Fan, W., Jin, X., Xu, M., Xi, Y., Lu, W., Yang, X., et al. (2021). FARS2 deficiency in Drosophila reveals the developmental delay and seizure manifested by aberrant mitochondrial tRNA metabolism. *Nucleic Acids Res* 49(22)**,** 13108-13121. doi: 10.1093/nar/gkab1187.

Fan, Y., Han, J., Yang, Y., and Chen, T. (2022). Novel mitochondrial alanyl-tRNA synthetase 2 (AARS2) heterozygous mutations in a Chinese patient with adult-onset leukoencephalopathy. *BMC Neurol* 22(1)**,** 214. doi: 10.1186/s12883-022-02720-3.

Felhi, R., Charif, M., Sfaihi, L., Mkaouar-Rebai, E., Desquiret-Dumas, V., Kallel, R., et al. (2020). Mutations in aARS genes revealed by targeted next-generation sequencing in patients with mitochondrial diseases. *Mol Biol Rep* 47(5)**,** 3779-3787. doi: 10.1007/s11033-020-05425-3.

Forman, E.B., Gorman, K.M., Ennis, S., and King, M.D. (2019). FARS2 Causing Complex Hereditary Spastic Paraplegia With Dysphonia: Expanding the Disease Spectrum. *J Child Neurol* 34(10)**,** 621. doi: 10.1177/0883073819846805.

Gao, X., Xin, G., Tu, Y., Liang, X., Yang, H., Meng, H., et al. (2022). TARS2 variants causes combination oxidative phosphorylation deficiency-21: a case report and literature review. *Neuropediatrics*. doi: 10.1055/a-1949-9310.

Gibbons, W.J., Jr., Yan, Q., Li, R., Li, X., and Guan, M.X. (2004). Genomic organization, expression, and subcellular localization of mouse mitochondrial seryl-tRNA synthetase. *Biochem Biophys Res Commun* 317(3)**,** 774-778. doi: 10.1016/j.bbrc.2004.03.113.

Glamuzina, E., Brown, R., Hogarth, K., Saunders, D., Russell-Eggitt, I., Pitt, M., et al. (2012). Further delineation of pontocerebellar hypoplasia type 6 due to mutations in the gene encoding mitochondrial arginyl-tRNA synthetase, RARS2. *J Inherit Metab Dis* 35(3)**,** 459-467. doi: 10.1007/s10545-011-9413-6.

Göknar, N., Keleşoğlu, E., Kasap, N., Üçkardeş, D., and Candan, C. (2022). A case of chronic kidney disease with pulmonary hypertension, hyperuricemia, immunodeficiency and other extrarenal findings: Answers. *Pediatr Nephrol* 37(11)**,** 2617-2619. doi: 10.1007/s00467-022-05560-y.

Gong, Y., Lan, X.P., and Guo, S. (2022). IARS2-related disease manifesting as sideroblastic anemia and hypoparathyroidism: A case report. *Front Pediatr* 10**,** 1080664. doi: 10.3389/fped.2022.1080664.

Gotz, A., Tyynismaa, H., Euro, L., Ellonen, P., Hyotylainen, T., Ojala, T., et al. (2011). Exome sequencing identifies mitochondrial alanyl-tRNA synthetase mutations in infantile mitochondrial cardiomyopathy. *Am J Hum Genet* 88(5)**,** 635-642. doi: 10.1016/j.ajhg.2011.04.006.

Guerrero, C.M., and Bhatia, S. (2021). FARS2 (Phenylalanyl-tRNA Synthetase 2) Deficiency: A Novel Mutation Associated with EEG Phenotype of Epilepsy of Infancy with Migrating Focal Seizures (EIMFS). *J Pediatr Neurosci* 16(4)**,** 323-326. doi: 10.4103/jpn.JPN_207_20.

Guitart, T., Picchioni, D., Piñeyro, D., and Ribas de Pouplana, L. (2013). Human mitochondrial disease-like symptoms caused by a reduced tRNA aminoacylation activity in flies. *Nucleic Acids Res* 41(13)**,** 6595-6608. doi: 10.1093/nar/gkt402.

Güngör, O., Özkaya, A.K., Şahin, Y., Güngör, G., Dilber, C., and Aydın, K. (2016). A compound heterozygous EARS2 mutation associated with mild leukoencephalopathy with thalamus and brainstem involvement and high lactate (LTBL). *Brain Dev* 38(9)**,** 857-861. doi: 10.1016/j.braindev.2016.04.002.

Gurtner, C., Hug, P., Kleiter, M., Köhler, K., Dietschi, E., Jagannathan, V., et al. (2020). YARS2 Missense Variant in Belgian Shepherd Dogs with Cardiomyopathy and Juvenile Mortality. *Genes (Basel)* 11(3). doi: 10.3390/genes11030313.

Hallmann, K., Zsurka, G., Moskau-Hartmann, S., Kirschner, J., Korinthenberg, R., Ruppert, A.K., et al. (2014). A homozygous splice-site mutation in CARS2 is associated with progressive myoclonic epilepsy. *Neurology* 83(23)**,** 2183-2187. doi: 10.1212/WNL.0000000000001055.

He, P., Wang, Q., Hong, X., and Yuan, H. (2023). Novel TARS2 variant identified in a Chinese patient with mitochondrial encephalomyopathy and a systematic review. *Am J Med Genet A* 191(1)**,** 70-76. doi: 10.1002/ajmg.a.62988.

Hilander, T., Zhou, X.L., Konovalova, S., Zhang, F.P., Euro, L., Chilov, D., et al. (2018). Editing activity for eliminating mischarged tRNAs is essential in mammalian mitochondria. *Nucleic Acids Res* 46(2)**,** 849-860. doi: 10.1093/nar/gkx1231.

Holmbeck, M.A., Donner, J.R., Villa-Cuesta, E., and Rand, D.M. (2015). A Drosophila model for mito-nuclear diseases generated by an incompatible interaction between tRNA and tRNA synthetase. *Dis Model Mech* 8(8)**,** 843-854. doi: 10.1242/dmm.019323.

Hotait, M., Nasreddine, W., El-Khoury, R., Dirani, M., Nawfal, O., and Beydoun, A. (2020). FARS2 Mutations: More Than Two Phenotypes? A Case Report. *Front Genet* 11**,** 787. doi: 10.3389/fgene.2020.00787.

Hu, W., Fang, H., Peng, Y., Li, L., Guo, D., Tang, J., et al. (2022). Clinical and genetic analyses of premature mitochondrial encephalopathy with epilepsia partialis continua caused by novel biallelic NARS2 mutations. *Front Neurosci* 16**,** 1076183. doi: 10.3389/fnins.2022.1076183.

Hübers, A., Huppertz, H.J., Wortmann, S.B., and Kassubek, J. (2020). Mutation of the WARS2 Gene as the Cause of a Severe Hyperkinetic Movement Disorder. *Mov Disord Clin Pract* 7(1)**,** 88-90. doi: 10.1002/mdc3.12855.

Ilinca, A., Kafantari, E., and Puschmann, A. (2022). A relatively common hypomorphic variant in WARS2 causes monogenic disease. *Parkinsonism Relat Disord* 94**,** 129-131. doi: 10.1016/j.parkreldis.2022.01.012.

Isohanni, P., Linnankivi, T., Buzkova, J., Lönnqvist, T., Pihko, H., Valanne, L., et al. (2010). DARS2 mutations in mitochondrial leucoencephalopathy and multiple sclerosis. *J Med Genet* 47(1)**,** 66-70. doi: 10.1136/jmg.2009.068221.

Jabbour, S., and Harissi-Dagher, M. (2016). Recessive Mutation in a Nuclear-Encoded Mitochondrial tRNA Synthetase Associated With Infantile Cataract, Congenital Neurotrophic Keratitis, and Orbital Myopathy. *Cornea* 35(6)**,** 894-896. doi: 10.1097/ico.0000000000000847.

Jin, X., Zhang, Z., Nie, Z., Wang, C., Meng, F., Yi, Q., et al. (2021). An animal model for mitochondrial tyrosyl-tRNA synthetase deficiency reveals links between oxidative phosphorylation and retinal function. *J Biol Chem* 296**,** 100437. doi: 10.1016/j.jbc.2021.100437.

Joseph, J.T., Innes, A.M., Smith, A.C., Vanstone, M.R., Schwartzentruber, J.A., Bulman, D.E., et al. (2014). Neuropathologic features of pontocerebellar hypoplasia type 6. *J Neuropathol Exp Neurol* 73(11)**,** 1009-1025. doi: 10.1097/nen.0000000000000123.

Kapoor, D., Majethia, P., Anand, A., Shukla, A., and Sharma, S. (2021). Expanding the electro-clinical phenotype of CARS2associated neuroregression. *Epilepsy Behav Rep* 16**,** 100485. doi: 10.1016/j.ebr.2021.100485.

Kasher, P.R., Namavar, Y., van Tijn, P., Fluiter, K., Sizarov, A., Kamermans, M., et al. (2011). Impairment of the tRNA-splicing endonuclease subunit 54 (tsen54) gene causes neurological abnormalities and larval death in zebrafish models of pontocerebellar hypoplasia. *Hum Mol Genet* 20(8)**,** 1574-1584. doi: 10.1093/hmg/ddr034.

Kastrissianakis, K., Anand, G., Quaghebeur, G., Price, S., Prabhakar, P., Marinova, J., et al. (2013). Subdural effusions and lack of early pontocerebellar hypoplasia in siblings with RARS2 mutations. *Arch Dis Child* 98(12)**,** 1004-1007. doi: 10.1136/archdischild-2013-304308.

Kayvanpour, E., Wisdom, M., Lackner, M.K., Sedaghat-Hamedani, F., Boeckel, J.N., Müller, M., et al. (2022). VARS2 Depletion Leads to Activation of the Integrated Stress Response and Disruptions in Mitochondrial Fatty Acid Oxidation. *Int J Mol Sci* 23(13). doi: 10.3390/ijms23137327.

Kevelam, S.H., Klouwer, F.C., Fock, J.M., Salomons, G.S., Bugiani, M., and van der Knaap, M.S. (2016). Absent Thalami Caused by a Homozygous EARS2 Mutation: Expanding Disease Spectrum of LTBL. *Neuropediatrics* 47(1)**,** 64-67. doi: 10.1055/s-0035-1568987.

Kiraly-Borri, C., Jevon, G., Ji, W., Jeffries, L., Ricciardi, J.L., Konstantino, M., et al. (2019). Siblings with lethal primary pulmonary hypoplasia and compound heterozygous variants in the AARS2 gene: further delineation of the phenotypic spectrum. *Cold Spring Harb Mol Case Stud* 5(3). doi: 10.1101/mcs.a003699.

Kistol, D., Tsygankova, P., Krylova, T., Bychkov, I., Itkis, Y., Nikolaeva, E., et al. (2023). Leigh Syndrome: Spectrum of Molecular Defects and Clinical Features in Russia. *Int J Mol Sci* 24(2). doi: 10.3390/ijms24021597.

Köhler, C., Heyer, C., Hoffjan, S., Stemmler, S., Lücke, T., Thiels, C., et al. (2015). Early-onset leukoencephalopathy due to a homozygous missense mutation in the DARS2 gene. *Mol Cell Probes* 29(5)**,** 319-322. doi: 10.1016/j.mcp.2015.06.005.

Kosaki, R., Horikawa, R., Fujii, E., and Kosaki, K. (2018). Biallelic mutations in LARS2 can cause Perrault syndrome type 2 with neurologic symptoms. *Am J Med Genet A* 176(2)**,** 404-408. doi: 10.1002/ajmg.a.38552.

Kuo, M.E., Antonellis, A., and Shakkottai, V.G. (2020). Alanyl-tRNA Synthetase 2 (AARS2)-Related Ataxia Without Leukoencephalopathy. *Cerebellum* 19(1)**,** 154-160. doi: 10.1007/s12311-019-01080-y.

Kušíková, K., Feichtinger, R.G., Csillag, B., Kalev, O.K., Weis, S., Duba, H.C., et al. (2021). Case Report and Review of the Literature: A New and a Recurrent Variant in the VARS2 Gene Are Associated With Isolated Lethal Hypertrophic Cardiomyopathy, Hyperlactatemia, and Pulmonary Hypertension in Early Infancy. *Front Pediatr* 9**,** 660076. doi: 10.3389/fped.2021.660076.

Labauge, P., Dorboz, I., Eymard-Pierre, E., Dereeper, O., and Boespflug-Tanguy, O. (2011). Clinically asymptomatic adult patient with extensive LBSL MRI pattern and DARS2 mutations. *J Neurol* 258(2)**,** 335-337. doi: 10.1007/s00415-010-5755-5.

Lan, M.Y., Chang, Y.Y., Yeh, T.H., Lin, T.K., and Lu, C.S. (2017). Leukoencephalopathy with brainstem and spinal cord involvement and lactate elevation (LBSL) with a novel DARS2 mutation and isolated progressive spastic paraparesis. *J Neurol Sci* 372**,** 229-231. doi: 10.1016/j.jns.2016.11.058.

Lax, N.Z., Alston, C.L., Schon, K., Park, S.M., Krishnakumar, D., He, L., et al. (2015). Neuropathologic Characterization of Pontocerebellar Hypoplasia Type 6 Associated With Cardiomyopathy and Hydrops Fetalis and Severe Multisystem Respiratory Chain Deficiency due to Novel RARS2 Mutations. *J Neuropathol Exp Neurol* 74(7)**,** 688-703. doi: 10.1097/nen.0000000000000209.

Lee, J.S., Yoo, T., Lee, M., Lee, Y., Jeon, E., Kim, S.Y., et al. (2020). Genetic heterogeneity in Leigh syndrome: Highlighting treatable and novel genetic causes. *Clin Genet* 97(4)**,** 586-594. doi: 10.1111/cge.13713.

Lee, S.S., Lee, R.Y., Fraser, A.G., Kamath, R.S., Ahringer, J., and Ruvkun, G. (2003). A systematic RNAi screen identifies a critical role for mitochondria in C. elegans longevity. *Nat Genet* 33(1)**,** 40-48. doi: 10.1038/ng1056.

Lerat, J., Jonard, L., Loundon, N., Christin-Maitre, S., Lacombe, D., Goizet, C., et al. (2016). An Application of NGS for Molecular Investigations in Perrault Syndrome: Study of 14 Families and Review of the Literature. *Hum Mutat* 37(12)**,** 1354-1362. doi: 10.1002/humu.23120.

Li, B., Chen, K., Liu, F., Zhang, J., Chen, X., Chen, T., et al. (2021a). Developmental Angiogenesis Requires the Mitochondrial Phenylalanyl-tRNA Synthetase. *Front Cardiovasc Med* 8**,** 724846. doi: 10.3389/fcvm.2021.724846.

Li, H., Wang, W., Han, X., Zhang, Y., Dai, L., Xu, M., et al. (2021b). Clinical Attributes and Electroencephalogram Analysis of Patients With Varying Alpers' Syndrome Genotypes. *Front Pharmacol* 12**,** 669516. doi: 10.3389/fphar.2021.669516.

Li, J.L., Lee, N.C., Chen, P.S., Lee, G.H., and Wu, R.M. (2021c). Leukoencephalopathy with Brainstem and Spinal Cord Involvement and Lactate Elevation: A Novel DARS2 Mutation and Intra-Familial Heterogeneity. *Mov Disord Clin Pract* 8(7)**,** 1116-1122. doi: 10.1002/mdc3.13281.

Li, X., Peng, B., Hou, C., Li, J., Zeng, Y., Wu, W., et al. (2020). Novel compound heterozygous TARS2 variants in a Chinese family with mitochondrial encephalomyopathy: a case report. *BMC Med Genet* 21(1)**,** 217. doi: 10.1186/s12881-020-01149-0.

Li, Z., Schonberg, R., Guidugli, L., Johnson, A.K., Arnovitz, S., Yang, S., et al. (2015). A novel mutation in the promoter of RARS2 causes pontocerebellar hypoplasia in two siblings. *J Hum Genet* 60(7)**,** 363-369. doi: 10.1038/jhg.2015.31.

Liberfarb, R.M., Jackson, A.H., Eavey, R.D., and Robb, R.M. (1993). Unique hereditary sensory and autonomic neuropathy with growth hormone deficiency. *J Child Neurol* 8(3)**,** 271-276. doi: 10.1177/088307389300800312.

Lin, J., Chiconelli Faria, E., Da Rocha, A.J., Rodrigues Masruha, M., Pereira Vilanova, L.C., Scheper, G.C., et al. (2010). Leukoencephalopathy with brainstem and spinal cord involvement and normal lactate: a new mutation in the DARS2 gene. *J Child Neurol* 25(11)**,** 1425-1428. doi: 10.1177/0883073810370897.

Lin, T.K., Chang, Y.Y., Lin, H.Y., Liou, C.W., Wang, P.W., Chuang, J.H., et al. (2019). Mitochondrial dysfunctions in leukoencephalopathy with brainstem and spinal cord involvement and lactate elevation (LBSL). *PLoS One* 14(10)**,** e0224173. doi: 10.1371/journal.pone.0224173.

Linnankivi, T., Neupane, N., Richter, U., Isohanni, P., and Tyynismaa, H. (2016). Splicing Defect in Mitochondrial Seryl-tRNA Synthetase Gene Causes Progressive Spastic Paresis Instead of HUPRA Syndrome. *Hum Mutat* 37(9)**,** 884-888. doi: 10.1002/humu.23021.

Lühl, S., Bode, H., Schlötzer, W., Bartsakoulia, M., Horvath, R., Abicht, A., et al. (2016). Novel homozygous RARS2 mutation in two siblings without pontocerebellar hypoplasia - further expansion of the phenotypic spectrum. *Orphanet J Rare Dis* 11(1)**,** 140. doi: 10.1186/s13023-016-0525-9.

Lynch, D.S., Zhang, W.J., Lakshmanan, R., Kinsella, J.A., Uzun, G.A., Karbay, M., et al. (2016). Analysis of Mutations in AARS2 in a Series of CSF1R-Negative Patients With Adult-Onset Leukoencephalopathy With Axonal Spheroids and Pigmented Glia. *JAMA Neurol* 73(12)**,** 1433-1439. doi: 10.1001/jamaneurol.2016.2229.

M, A.A., Vernon, H.J., Ferguson, M., and Kline, A.D. (2020). PARS2-associated mitochondrial disease: A case report of a patient with prolonged survival and literature review. *Mol Genet Metab Rep* 24**,** 100613. doi: 10.1016/j.ymgmr.2020.100613.

Ma, K., Xie, M., He, X., Liu, G., Lu, X., Peng, Q., et al. (2018). A novel compound heterozygous mutation in VARS2 in a newborn with mitochondrial cardiomyopathy: a case report of a Chinese family. *BMC Med Genet* 19(1)**,** 202. doi: 10.1186/s12881-018-0689-3.

Maffezzini, C., Laine, I., Dallabona, C., Clemente, P., Calvo-Garrido, J., Wibom, R., et al. (2019). Mutations in the mitochondrial tryptophanyl-tRNA synthetase cause growth retardation and progressive leukoencephalopathy. *Mol Genet Genomic Med* 7(6)**,** e654. doi: 10.1002/mgg3.654.

Martikainen, M.H., Ellfolk, U., and Majamaa, K. (2013). Impaired information-processing speed and working memory in leukoencephalopathy with brainstem and spinal cord involvement and elevated lactate (LBSL) and DARS2 mutations: a report of three adult patients. *J Neurol* 260(8)**,** 2078-2083. doi: 10.1007/s00415-013-6940-0.

Martinelli, S., Cordeddu, V., Galosi, S., Lanzo, A., Palma, E., Pannone, L., et al. (2020). Co-occurring WARS2 and CHRNA6 mutations in a child with a severe form of infantile parkinsonism. *Parkinsonism Relat Disord* 72**,** 75-79. doi: 10.1016/j.parkreldis.2020.02.003.

Mathew, T., Avati, A., D'Souza, D., and Therambil, M. (2018). Expanding spectrum of RARS2 gene disorders: Myoclonic epilepsy, mental retardation, spasticity, and extrapyramidal features. *Epilepsia Open* 3(2)**,** 270-275. doi: 10.1002/epi4.12108.

Mazurova, S., Magner, M., Kucerova-Vidrova, V., Vondrackova, A., Stranecky, V., Pristoupilova, A., et al. (2017). Thymidine kinase 2 and alanyl-tRNA synthetase 2 deficiencies cause lethal mitochondrial cardiomyopathy: case reports and review of the literature. *Cardiol Young* 27(5)**,** 936-944. doi: 10.1017/s1047951116001876.

Meiklejohn, C.D., Holmbeck, M.A., Siddiq, M.A., Abt, D.N., Rand, D.M., and Montooth, K.L. (2013). An Incompatibility between a mitochondrial tRNA and its nuclear-encoded tRNA synthetase compromises development and fitness in Drosophila. *PLoS Genet* 9(1)**,** e1003238. doi: 10.1371/journal.pgen.1003238.

Meszarosova, A.U., Seeman, P., Jencik, J., Drabova, J., Cibochova, R., Stellmachova, J., et al. (2020). Two types of recessive hereditary spastic paraplegia in Roma patients in compound heterozygous state; no ethnically prevalent variant found. *Neurosci Lett* 721**,** 134800. doi: 10.1016/j.neulet.2020.134800.

Mierzewska, H., van der Knaap, M.S., Scheper, G.C., Bekiesinska-Figatowska, M., Szczepanik, E., and Jurkiewicz, E. (2011). Leukoencephalopathy with brain stem and spinal cord involvement and lactate elevation in the first Polish patient. *Brain Dev* 33(9)**,** 713-717. doi: 10.1016/j.braindev.2010.12.005.

Minardi, R., Licchetta, L., Baroni, M.C., Pippucci, T., Stipa, C., Mostacci, B., et al. (2020). Whole-exome sequencing in adult patients with developmental and epileptic encephalopathy: It is never too late. *Clin Genet* 98(5)**,** 477-485. doi: 10.1111/cge.13823.

Miyake, N., Yamashita, S., Kurosawa, K., Miyatake, S., Tsurusaki, Y., Doi, H., et al. (2011). A novel homozygous mutation of DARS2 may cause a severe LBSL variant. *Clin Genet* 80(3)**,** 293-296. doi: 10.1111/j.1399-0004.2011.01644.x.

Mizuguchi, T., Nakashima, M., Kato, M., Yamada, K., Okanishi, T., Ekhilevitch, N., et al. (2017). PARS2 and NARS2 mutations in infantile-onset neurodegenerative disorder. *J Hum Genet* 62(5)**,** 525-529. doi: 10.1038/jhg.2016.163.

Mo, L., Li, R., He, C., Chen, Q., Xu, C., Shen, L., et al. (2023). Hedgehog pathway is negatively regulated during the development of Drosophila melanogaster PheRS-m (Drosophila homologs gene of human FARS2) mutants. *Hum Cell* 36(1)**,** 121-131. doi: 10.1007/s13577-022-00796-0.

Moosa, S., Haagerup, A., Gregersen, P.A., Petersen, K.K., Altmüller, J., Thiele, H., et al. (2017). Confirmation of CAGSSS syndrome as a distinct entity in a Danish patient with a novel homozygous mutation in IARS2. *Am J Med Genet A* 173(4)**,** 1102-1108. doi: 10.1002/ajmg.a.38116.

Musante, L., Püttmann, L., Kahrizi, K., Garshasbi, M., Hu, H., Stehr, H., et al. (2017). Mutations of the aminoacyl-tRNA-synthetases SARS and WARS2 are implicated in the etiology of autosomal recessive intellectual disability. *Hum Mutat* 38(6)**,** 621-636. doi: 10.1002/humu.23205.

Mušo, M., Bentley, L., Vizor, L., Yon, M., Burling, K., Barker, P., et al. (2022). A Wars2 mutant mouse shows a sex and diet specific change in fat distribution, reduced food intake and depot-specific upregulation of WAT browning. *Front Physiol* 13**,** 953199. doi: 10.3389/fphys.2022.953199.

Nakajima, J., Eminoglu, T.F., Vatansever, G., Nakashima, M., Tsurusaki, Y., Saitsu, H., et al. (2014). A novel homozygous YARS2 mutation causes severe myopathy, lactic acidosis, and sideroblastic anemia 2. *J Hum Genet* 59(4)**,** 229-232. doi: 10.1038/jhg.2013.143.

Nakayama, T., Wu, J., Galvin-Parton, P., Weiss, J., Andriola, M.R., Hill, R.S., et al. (2017). Deficient activity of alanyl-tRNA synthetase underlies an autosomal recessive syndrome of progressive microcephaly, hypomyelination, and epileptic encephalopathy. *Hum Mutat* 38(10)**,** 1348-1354. doi: 10.1002/humu.23250.

Namavar, Y., Barth, P.G., Kasher, P.R., van Ruissen, F., Brockmann, K., Bernert, G., et al. (2011). Clinical, neuroradiological and genetic findings in pontocerebellar hypoplasia. *Brain* 134(Pt 1)**,** 143-156. doi: 10.1093/brain/awq287.

Nemeth, C.L., Tomlinson, S.N., Rosen, M., O'Brien, B.M., Larraza, O., Jain, M., et al. (2020). Neuronal ablation of mt-AspRS in mice induces immune pathway activation prior to severe and progressive cortical and behavioral disruption. *Exp Neurol* 326**,** 113164. doi: 10.1016/j.expneurol.2019.113164.

Nevanlinna, V., Konovalova, S., Ceulemans, B., Muona, M., Laari, A., Hilander, T., et al. (2020). A patient with pontocerebellar hypoplasia type 6: Novel RARS2 mutations, comparison to previously published patients and clinical distinction from PEHO syndrome. *Eur J Med Genet* 63(3)**,** 103766. doi: 10.1016/j.ejmg.2019.103766.

Neyroud, A.S., Rudinger-Thirion, J., Frugier, M., Riley, L.G., Bidet, M., Akloul, L., et al. (2022). LARS2 variants can present as premature ovarian insufficiency in the absence of overt hearing loss. *Eur J Hum Genet*. doi: 10.1038/s41431-022-01252-1.

Ngo, J., Prokop, J.W., Umfleet, J., and Seaver, L.H. (2021). Perinatal Manifestations of DARS2-Associated Leukoencephalopathy With Brainstem and Spinal Cord Involvement and Lactate Elevation (LBSL). *Child Neurol Open* 8**,** 2329048x211019173. doi: 10.1177/2329048x211019173.

Ngoh, A., Bras, J., Guerreiro, R., Meyer, E., McTague, A., Dawson, E., et al. (2016). RARS2 mutations in a sibship with infantile spasms. *Epilepsia* 57(5)**,** e97-e102. doi: 10.1111/epi.13358.

Ni, M., Black, L.F., Pan, C., Vu, H., Pei, J., Ko, B., et al. (2021). Metabolic impact of pathogenic variants in the mitochondrial glutamyl-tRNA synthetase EARS2. *J Inherit Metab Dis* 44(4)**,** 949-960. doi: 10.1002/jimd.12387.

Nielsen, S.K., Hansen, F., Schroder, H.D., Wibrand, F., Gustafsson, F., and Mogensen, J. (2020). Recessive Inheritance of a Rare Variant in the Nuclear Mitochondrial Gene for AARS2 in Late-Onset Dilated Cardiomyopathy. *Circ Genom Precis Med* 13(5)**,** 560-562. doi: 10.1161/CIRCGEN.120.003086.

Nishri, D., Goldberg-Stern, H., Noyman, I., Blumkin, L., Kivity, S., Saitsu, H., et al. (2016). RARS2 mutations cause early onset epileptic encephalopathy without ponto-cerebellar hypoplasia. *Eur J Paediatr Neurol* 20(3)**,** 412-417. doi: 10.1016/j.ejpn.2016.02.012.

Nuovo, S., Micalizzi, A., Romaniello, R., Arrigoni, F., Ginevrino, M., Casella, A., et al. (2022). Refining the mutational spectrum and gene-phenotype correlates in pontocerebellar hypoplasia: results of a multicentric study. *J Med Genet* 59(4)**,** 399-409. doi: 10.1136/jmedgenet-2020-107497.

Okamoto, N., Miya, F., Tsunoda, T., Kanemura, Y., Saitoh, S., Kato, M., et al. (2022). Four pedigrees with aminoacyl-tRNA synthetase abnormalities. *Neurol Sci* 43(4)**,** 2765-2774. doi: 10.1007/s10072-021-05626-z.

Oliveira, R., Sommerville, E.W., Thompson, K., Nunes, J., Pyle, A., Grazina, M., et al. (2017). Lethal Neonatal LTBL Associated with Biallelic EARS2 Variants: Case Report and Review of the Reported Neuroradiological Features. *JIMD Rep* 33**,** 61-68. doi: 10.1007/8904_2016_581.

Orcesi, S., La Piana, R., Uggetti, C., Tonduti, D., Pichiecchio, A., Pasin, M., et al. (2011). Spinal cord calcification in an early-onset progressive leukoencephalopathy. *J Child Neurol* 26(7)**,** 876-880. doi: 10.1177/0883073810390038.

Pan, Z., Xu, H., Tian, Y., Liu, D., Liu, H., Li, R., et al. (2020). Perrault syndrome: Clinical report and retrospective analysis. *Mol Genet Genomic Med* 8(10)**,** e1445. doi: 10.1002/mgg3.1445.

Peragallo, J.H., Keller, S., van der Knaap, M.S., Soares, B.P., and Shankar, S.P. (2018). Retinopathy and optic atrophy: Expanding the phenotypic spectrum of pathogenic variants in the AARS2 gene. *Ophthalmic Genet* 39(1)**,** 99-102. doi: 10.1080/13816810.2017.1350723.

Pereira, S., Adrião, M., Sampaio, M., Basto, M.A., Rodrigues, E., Vilarinho, L., et al. (2018). Mitochondrial Encephalopathy: First Portuguese Report of a VARS2 Causative Variant. *JIMD Rep* 42**,** 113-119. doi: 10.1007/8904_2018_89.

Petzold, G.C., Bohner, G., Klingebiel, R., Amberger, N., van der Knaap, M.S., and Zschenderlein, R. (2006). Adult onset leucoencephalopathy with brain stem and spinal cord involvement and normal lactate. *J Neurol Neurosurg Psychiatry* 77(7)**,** 889-891. doi: 10.1136/jnnp.2005.078568.

Pierce, S.B., Chisholm, K.M., Lynch, E.D., Lee, M.K., Walsh, T., Opitz, J.M., et al. (2011). Mutations in mitochondrial histidyl tRNA synthetase HARS2 cause ovarian dysgenesis and sensorineural hearing loss of Perrault syndrome. *Proc Natl Acad Sci U S A* 108(16)**,** 6543-6548. doi: 10.1073/pnas.1103471108.

Pierce, S.B., Gersak, K., Michaelson-Cohen, R., Walsh, T., Lee, M.K., Malach, D., et al. (2013). Mutations in LARS2, encoding mitochondrial leucyl-tRNA synthetase, lead to premature ovarian failure and hearing loss in Perrault syndrome. *Am J Hum Genet* 92(4)**,** 614-620. doi: 10.1016/j.ajhg.2013.03.007.

Potter, P.K., Bowl, M.R., Jeyarajan, P., Wisby, L., Blease, A., Goldsworthy, M.E., et al. (2016). Novel gene function revealed by mouse mutagenesis screens for models of age-related disease. *Nat Commun* 7**,** 12444. doi: 10.1038/ncomms12444.

Pravenec, M., Zídek, V., Landa, V., Mlejnek, P., Šilhavý, J., Šimáková, M., et al. (2017). Mutant Wars2 gene in spontaneously hypertensive rats impairs brown adipose tissue function and predisposes to visceral obesity. *Physiol Res* 66(6)**,** 917-924. doi: 10.33549/physiolres.933811.

Rankin, J., Brown, R., Dobyns, W.B., Harington, J., Patel, J., Quinn, M., et al. (2010). Pontocerebellar hypoplasia type 6: A British case with PEHO-like features. *Am J Med Genet A* 152a(8)**,** 2079-2084. doi: 10.1002/ajmg.a.33531.

Raviglione, F., Conte, G., Ghezzi, D., Parazzini, C., Righini, A., Vergaro, R., et al. (2016). Clinical findings in a patient with FARS2 mutations and early-infantile-encephalopathy with epilepsy. *Am J Med Genet A* 170(11)**,** 3004-3007. doi: 10.1002/ajmg.a.37836.

Riley, L.G., Cooper, S., Hickey, P., Rudinger-Thirion, J., McKenzie, M., Compton, A., et al. (2010). Mutation of the mitochondrial tyrosyl-tRNA synthetase gene, YARS2, causes myopathy, lactic acidosis, and sideroblastic anemia--MLASA syndrome. *Am J Hum Genet* 87(1)**,** 52-59. doi: 10.1016/j.ajhg.2010.06.001.

Riley, L.G., Heeney, M.M., Rudinger-Thirion, J., Frugier, M., Campagna, D.R., Zhou, R., et al. (2018). The phenotypic spectrum of germline YARS2 variants: from isolated sideroblastic anemia to mitochondrial myopathy, lactic acidosis and sideroblastic anemia 2. *Haematologica* 103(12)**,** 2008-2015. doi: 10.3324/haematol.2017.182659.

Riley, L.G., Menezes, M.J., Rudinger-Thirion, J., Duff, R., de Lonlay, P., Rotig, A., et al. (2013). Phenotypic variability and identification of novel YARS2 mutations in YARS2 mitochondrial myopathy, lactic acidosis and sideroblastic anaemia. *Orphanet J Rare Dis* 8**,** 193. doi: 10.1186/1750-1172-8-193.

Riley, L.G., Rudinger-Thirion, J., Frugier, M., Wilson, M., Luig, M., Alahakoon, T.I., et al. (2020). The expanding LARS2 phenotypic spectrum: HLASA, Perrault syndrome with leukodystrophy, and mitochondrial myopathy. *Hum Mutat* 41(8)**,** 1425-1434. doi: 10.1002/humu.24050.

Riley, L.G., Rudinger-Thirion, J., Schmitz-Abe, K., Thorburn, D.R., Davis, R.L., Teo, J., et al. (2016). LARS2 Variants Associated with Hydrops, Lactic Acidosis, Sideroblastic Anemia, and Multisystem Failure. *JIMD Rep* 28**,** 49-57. doi: 10.1007/8904_2015_515.

Rivera, H., Martín-Hernández, E., Delmiro, A., García-Silva, M.T., Quijada-Fraile, P., Muley, R., et al. (2013). A new mutation in the gene encoding mitochondrial seryl-tRNA synthetase as a cause of HUPRA syndrome. *BMC Nephrol* 14**,** 195. doi: 10.1186/1471-2369-14-195.

Roux, C.J., Barcia, G., Schiff, M., Sissler, M., Levy, R., Dangouloff-Ros, V., et al. (2021). Phenotypic diversity of brain MRI patterns in mitochondrial aminoacyl-tRNA synthetase mutations. *Mol Genet Metab* 133(2)**,** 222-229. doi: 10.1016/j.ymgme.2021.04.004.

Rudaks, L.I., Watson, E., Oboudiyat, C., Kumar, K.R., Sullivan, P., Cowley, M.J., et al. (2022). Decompensation of cardiorespiratory function and emergence of anemia during pregnancy in a case of mitochondrial myopathy, lactic acidosis, and sideroblastic anemia 2 with compound heterozygous YARS2 pathogenic variants. *Am J Med Genet A* 188(7)**,** 2226-2230. doi: 10.1002/ajmg.a.62755.

Rumyantseva, A., Motori, E., and Trifunovic, A. (2020). DARS2 is indispensable for Purkinje cell survival and protects against cerebellar ataxia. *Hum Mol Genet* 29(17)**,** 2845-2854. doi: 10.1093/hmg/ddaa176.

Ruzman, L., Kolic, I., Radic Nisevic, J., Ruzic Barsic, A., Skarpa Prpic, I., and Prpic, I. (2019). A novel VARS2 gene variant in a patient with epileptic encephalopathy. *Ups J Med Sci* 124(4)**,** 273-277. doi: 10.1080/03009734.2019.1670297.

Şahin, S., Cansu, A., Kalay, E., Dinçer, T., Kul, S., Çakır İ, M., et al. (2016). Leukoencephalopathy with thalamus and brainstem involvement and high lactate caused by novel mutations in the EARS2 gene in two siblings. *J Neurol Sci* 365**,** 54-58. doi: 10.1016/j.jns.2016.04.008.

Samanta, D., Gokden, M., and Willis, E. (2018). Clinicopathologic Findings of CARS2 Mutation. *Pediatr Neurol* 87**,** 65-69. doi: 10.1016/j.pediatrneurol.2018.06.009.

Sasarman, F., Nishimura, T., Thiffault, I., and Shoubridge, E.A. (2012). A novel mutation in YARS2 causes myopathy with lactic acidosis and sideroblastic anemia. *Hum Mutat* 33(8)**,** 1201-1206. doi: 10.1002/humu.22098.

Sawada, D., Naito, S., Aoyama, H., Shiohama, T., Ichikawa, T., Imagawa, E., et al. (2021). Remitting and exacerbating white matter lesions in leukoencephalopathy with thalamus and brainstem involvement and high lactate. *Brain Dev* 43(7)**,** 798-803. doi: 10.1016/j.braindev.2021.03.008.

Scheper, G.C., van der Klok, T., van Andel, R.J., van Berkel, C.G., Sissler, M., Smet, J., et al. (2007). Mitochondrial aspartyl-tRNA synthetase deficiency causes leukoencephalopathy with brain stem and spinal cord involvement and lactate elevation. *Nat Genet* 39(4)**,** 534-539. doi: 10.1038/ng2013.

Schwartzentruber, J., Buhas, D., Majewski, J., Sasarman, F., Papillon-Cavanagh, S., Thiffault, I., et al. (2014). Mutation in the nuclear-encoded mitochondrial isoleucyl-tRNA synthetase IARS2 in patients with cataracts, growth hormone deficiency with short stature, partial sensorineural deafness, and peripheral neuropathy or with Leigh syndrome. *Hum Mutat* 35(11)**,** 1285-1289. doi: 10.1002/humu.22629.

Seaver, L.H., DeRoos, S., Andersen, N.J., Betz, B., Prokop, J., Lannen, N., et al. (2018). Lethal NARS2-Related Disorder Associated With Rapidly Progressive Intractable Epilepsy and Global Brain Atrophy. *Pediatr Neurol* 89**,** 26-30. doi: 10.1016/j.pediatrneurol.2018.07.014.

Sellars, E.A., Balmakund, T., Bosanko, K., Nichols, B.L., Kahler, S.G., and Zarate, Y.A. (2017). Severe Metabolic Acidosis and Hepatopathy due to Leukoencephalopathy with Thalamus and Brainstem Involvement and High Lactate. *Neuropediatrics* 48(2)**,** 108-110. doi: 10.1055/s-0036-1593984.

Sevinç, S., İnci, A., Ezgü, F.S., and Eminoğlu, F.T. (2022). A Patient with a Novel RARS2 Variant Exhibiting Liver Involvement as a New Clinical Feature and Review of the Literature. *Mol Syndromol* 13(3)**,** 226-234. doi: 10.1159/000519604.

Shahni, R., Wedatilake, Y., Cleary, M.A., Lindley, K.J., Sibson, K.R., and Rahman, S. (2013). A distinct mitochondrial myopathy, lactic acidosis and sideroblastic anemia (MLASA) phenotype associates with YARS2 mutations. *Am J Med Genet A* 161a(9)**,** 2334-2338. doi: 10.1002/ajmg.a.36065.

Shamseldin, H.E., Alshammari, M., Al-Sheddi, T., Salih, M.A., Alkhalidi, H., Kentab, A., et al. (2012). Genomic analysis of mitochondrial diseases in a consanguineous population reveals novel candidate disease genes. *J Med Genet* 49(4)**,** 234-241. doi: 10.1136/jmedgenet-2012-100836.

Sharma, S., Sankhyan, N., Kumar, A., Scheper, G.C., van der Knaap, M.S., and Gulati, S. (2011). Leukoencephalopathy with brain stem and spinal cord involvement and high lactate: a genetically proven case without elevated white matter lactate. *J Child Neurol* 26(6)**,** 773-776. doi: 10.1177/0883073810390695.

Simon, M., Richard, E.M., Wang, X., Shahzad, M., Huang, V.H., Qaiser, T.A., et al. (2015). Mutations of human NARS2, encoding the mitochondrial asparaginyl-tRNA synthetase, cause nonsyndromic deafness and Leigh syndrome. *PLoS Genet* 11(3)**,** e1005097. doi: 10.1371/journal.pgen.1005097.

Simons, C., Griffin, L.B., Helman, G., Golas, G., Pizzino, A., Bloom, M., et al. (2015). Loss-of-function alanyl-tRNA synthetase mutations cause an autosomal-recessive early-onset epileptic encephalopathy with persistent myelination defect. *Am J Hum Genet* 96(4)**,** 675-681. doi: 10.1016/j.ajhg.2015.02.012.

Skorvanek, M., Rektorova, I., Mandemakers, W., Wagner, M., Steinfeld, R., Orec, L., et al. (2022). WARS2 mutations cause dopa-responsive early-onset parkinsonism and progressive myoclonus ataxia. *Parkinsonism Relat Disord* 94**,** 54-61. doi: 10.1016/j.parkreldis.2021.11.030.

Smith, F., Hopton, S., Dallabona, C., Gilberti, M., Falkous, G., Norwood, F., et al. (2018). Sideroblastic anemia with myopathy secondary to novel, pathogenic missense variants in the YARS2 gene. *Haematologica* 103(12)**,** e564-e566. doi: 10.3324/haematol.2018.194464.

Sofou, K., Kollberg, G., Hedberg-Oldfors, C., and Oldfors, A. (2021). The phenotypic variability and natural history of NARS2 associated disease. *Eur J Paediatr Neurol* 31**,** 31-37. doi: 10.1016/j.ejpn.2021.01.012.

Sofou, K., Kollberg, G., Holmström, M., Dávila, M., Darin, N., Gustafsson, C.M., et al. (2015). Whole exome sequencing reveals mutations in NARS2 and PARS2, encoding the mitochondrial asparaginyl-tRNA synthetase and prolyl-tRNA synthetase, in patients with Alpers syndrome. *Mol Genet Genomic Med* 3(1)**,** 59-68. doi: 10.1002/mgg3.115.

Sofou, K., Moslemi, A.R., Kollberg, G., Bjarnadóttir, I., Oldfors, A., Nennesmo, I., et al. (2012). Phenotypic and genotypic variability in Alpers syndrome. *Eur J Paediatr Neurol* 16(4)**,** 379-389. doi: 10.1016/j.ejpn.2011.12.006.

Soldà, G., Caccia, S., Robusto, M., Chiereghin, C., Castorina, P., Ambrosetti, U., et al. (2016). First independent replication of the involvement of LARS2 in Perrault syndrome by whole-exome sequencing of an Italian family. *J Hum Genet* 61(4)**,** 295-300. doi: 10.1038/jhg.2015.149.

Sommerville, E.W., Ng, Y.S., Alston, C.L., Dallabona, C., Gilberti, M., He, L., et al. (2017). Clinical Features, Molecular Heterogeneity, and Prognostic Implications in YARS2-Related Mitochondrial Myopathy. *JAMA Neurol* 74(6)**,** 686-694. doi: 10.1001/jamaneurol.2016.4357.

Sommerville, E.W., Zhou, X.L., Oláhová, M., Jenkins, J., Euro, L., Konovalova, S., et al. (2019). Instability of the mitochondrial alanyl-tRNA synthetase underlies fatal infantile-onset cardiomyopathy. *Hum Mol Genet* 28(2)**,** 258-268. doi: 10.1093/hmg/ddy294.

Souissi, A., Ben Said, M., Frikha, F., Elloumi, I., Masmoudi, S., and Megarbane, A. (2021). Expanding the Clinical and Molecular Spectrum of HARS2-Perrault Syndrome: Identification of a Novel Homozygous Missense Variant in the HARS2 gene. *Genet Test Mol Biomarkers* 25(8)**,** 528-539. doi: 10.1089/gtmb.2021.0092.

Srivastava, S., Butala, A., Mahida, S., Richter, J., Mu, W., Poretti, A., et al. (2019). Expansion of the clinical spectrum associated with AARS2-related disorders. *Am J Med Genet A* 179(8)**,** 1556-1564. doi: 10.1002/ajmg.a.61188.

Steenweg, M.E., Ghezzi, D., Haack, T., Abbink, T.E., Martinelli, D., van Berkel, C.G., et al. (2012a). Leukoencephalopathy with thalamus and brainstem involvement and high lactate 'LTBL' caused by EARS2 mutations. *Brain* 135(Pt 5)**,** 1387-1394. doi: 10.1093/brain/aws070.

Steenweg, M.E., Pouwels, P.J., Wolf, N.I., van Wieringen, W.N., Barkhof, F., and van der Knaap, M.S. (2011). Leucoencephalopathy with brainstem and spinal cord involvement and high lactate: quantitative magnetic resonance imaging. *Brain* 134(Pt 11)**,** 3333-3341. doi: 10.1093/brain/awr254.

Steenweg, M.E., van Berge, L., van Berkel, C.G., de Coo, I.F., Temple, I.K., Brockmann, K., et al. (2012b). Early-onset LBSL: how severe does it get? *Neuropediatrics* 43(6)**,** 332-338. doi: 10.1055/s-0032-1329395.

Stellingwerff, M.D., Figuccia, S., Bellacchio, E., Alvarez, K., Castiglioni, C., Topaloglu, P., et al. (2021). LBSL: Case Series and DARS2 Variant Analysis in Early Severe Forms With Unexpected Presentations. *Neurol Genet* 7(2)**,** e559. doi: 10.1212/nxg.0000000000000559.

Štěrbová, K., Vlčková, M., Hansíková, H., Sebroňová, V., Sedláčková, L., Pavlíček, P., et al. (2021). Novel variants in the NARS2 gene as a cause of infantile-onset severe epilepsy leading to fatal refractory status epilepticus: case study and literature review. *Neurogenetics* 22(4)**,** 359-364. doi: 10.1007/s10048-021-00659-0.

Sun, J., Quan, C., Luo, S.S., Zhou, L., and Zhao, C.B. (2017). Leukodystrophy without Ovarian Failure Caused by Compound Heterozygous Alanyl-tRNA Synthetase 2 Mutations. *Chin Med J (Engl)* 130(24)**,** 3021-3022. doi: 10.4103/0366-6999.220300.

Sun, L., Lin, Z., Zhang, J., Shen, J., Wang, X., and Yang, J. (2022). Genetic etiological analysis of auditory neuropathy spectrum disorder by next-generation sequencing. *Front Neurol* 13**,** 1026695. doi: 10.3389/fneur.2022.1026695.

Synofzik, M., Schicks, J., Lindig, T., Biskup, S., Schmidt, T., Hansel, J., et al. (2011). Acetazolamide-responsive exercise-induced episodic ataxia associated with a novel homozygous DARS2 mutation. *J Med Genet* 48(10)**,** 713-715. doi: 10.1136/jmg.2011.090282.

Taglia, I., Di Donato, I., Bianchi, S., Cerase, A., Monti, L., Marconi, R., et al. (2018). AARS2-related ovarioleukodystrophy: Clinical and neuroimaging features of three new cases. *Acta Neurol Scand* 138(4)**,** 278-283. doi: 10.1111/ane.12954.

Takezawa, Y., Fujie, H., Kikuchi, A., Niihori, T., Funayama, R., Shirota, M., et al. (2018). Novel IARS2 mutations in Japanese siblings with CAGSSS, Leigh, and West syndrome. *Brain Dev* 40(10)**,** 934-938. doi: 10.1016/j.braindev.2018.06.010.

Tanaka, R., Takeguchi, R., Kuroda, M., Suzuki, N., Makita, Y., Yanagi, K., et al. (2022). Novel NARS2 variant causing leigh syndrome with normal lactate levels. *Hum Genome Var* 9(1)**,** 12. doi: 10.1038/s41439-022-00191-z.

Taskin, B.D., Karalok, Z.S., Gurkas, E., Aydin, K., Aydogmus, U., Ceylaner, S., et al. (2016). Early-Onset Mild Type Leukoencephalopathy Caused by a Homozygous EARS2 Mutation. *J Child Neurol* 31(7)**,** 938-941. doi: 10.1177/0883073816630087.

Taylor, R.W., Pyle, A., Griffin, H., Blakely, E.L., Duff, J., He, L., et al. (2014). Use of whole-exome sequencing to determine the genetic basis of multiple mitochondrial respiratory chain complex deficiencies. *Jama* 312(1)**,** 68-77. doi: 10.1001/jama.2014.7184.

Theisen, B.E., Rumyantseva, A., Cohen, J.S., Alcaraz, W.A., Shinde, D.N., Tang, S., et al. (2017). Deficiency of WARS2, encoding mitochondrial tryptophanyl tRNA synthetase, causes severe infantile onset leukoencephalopathy. *Am J Med Genet A* 173(9)**,** 2505-2510. doi: 10.1002/ajmg.a.38339.

Thiffault, I., Rioux, M.F., Tetreault, M., Jarry, J., Loiselle, L., Poirier, J., et al. (2006). A new autosomal recessive spastic ataxia associated with frequent white matter changes maps to 2q33-34. *Brain* 129(Pt 9)**,** 2332-2340. doi: 10.1093/brain/awl110.

Tucker, E.J., Rius, R., Jaillard, S., Bell, K., Lamont, P.J., Travessa, A., et al. (2020). Genomic sequencing highlights the diverse molecular causes of Perrault syndrome: a peroxisomal disorder (PEX6), metabolic disorders (CLPP, GGPS1), and mtDNA maintenance/translation disorders (LARS2, TFAM). *Hum Genet* 139(10)**,** 1325-1343. doi: 10.1007/s00439-020-02176-w.

Tylki-Szymanska, A., Jurkiewicz, E., Zakharova, E.Y., and Bobek-Billewicz, B. (2014). Leukoencephalopathy with brain stem and spinal cord involvement and lactate elevation: high outcome variation between two siblings. *Neuropediatrics* 45(3)**,** 188-191. doi: 10.1055/s-0033-1364105.

Tzoulis, C., Tran, G.T., Gjerde, I.O., Aasly, J., Neckelmann, G., Rydland, J., et al. (2012). Leukoencephalopathy with brainstem and spinal cord involvement caused by a novel mutation in the DARS2 gene. *J Neurol* 259(2)**,** 292-296. doi: 10.1007/s00415-011-6176-9.

Uluc, K., Baskan, O., Yildirim, K.A., Ozsahin, S., Koseoglu, M., Isak, B., et al. (2008). Leukoencephalopathy with brain stem and spinal cord involvement and high lactate: a genetically proven case with distinct MRI findings. *J Neurol Sci* 273(1-2)**,** 118-122. doi: 10.1016/j.jns.2008.06.002.

Upadia, J., Li, Y., Walano, N., Deputy, S., Gajewski, K., and Andersson, H.C. (2022). Genotype-phenotype correlation in IARS2-related diseases: A case report and review of literature. *Clin Case Rep* 10(2)**,** e05401. doi: 10.1002/ccr3.5401.

Vafaee-Shahi, M., Farhadi, M., Razmara, E., Morovvati, S., Ghasemi, S., Abedini, S.S., et al. (2022). Novel phenotype and genotype spectrum of NARS2 and literature review of previous mutations. *Ir J Med Sci* 191(4)**,** 1877-1890. doi: 10.1007/s11845-021-02736-7.

van Berge, L., Hamilton, E.M., Linnankivi, T., Uziel, G., Steenweg, M.E., Isohanni, P., et al. (2014). Leukoencephalopathy with brainstem and spinal cord involvement and lactate elevation: clinical and genetic characterization and target for therapy. *Brain* 137(Pt 4)**,** 1019-1029. doi: 10.1093/brain/awu026.

van der Knaap, M.S., Bugiani, M., Mendes, M.I., Riley, L.G., Smith, D.E.C., Rudinger-Thirion, J., et al. (2019). Biallelic variants in LARS2 and KARS cause deafness and (ovario)leukodystrophy. *Neurology* 92(11)**,** e1225-e1237. doi: 10.1212/wnl.0000000000007098.

van der Knaap, M.S., van der Voorn, P., Barkhof, F., Van Coster, R., Krägeloh-Mann, I., Feigenbaum, A., et al. (2003). A new leukoencephalopathy with brainstem and spinal cord involvement and high lactate. *Ann Neurol* 53(2)**,** 252-258. doi: 10.1002/ana.10456.

van Dijk, T., van Ruissen, F., Jaeger, B., Rodenburg, R.J., Tamminga, S., van Maarle, M., et al. (2017). RARS2 Mutations: Is Pontocerebellar Hypoplasia Type 6 a Mitochondrial Encephalopathy? *JIMD Rep* 33**,** 87-92. doi: 10.1007/8904_2016_584.

van Helden, R.W.J., Birket, M.J., Freund, C., Arendzen, C.H., Mikkers, H.M., Orlova, V., et al. (2021). Generation of three human induced pluripotent stem cell lines, LUMCi024-A, LUMCi025-A, and LUMCi026-A, from two patients with combined oxidative phosphorylation deficiency 8 and a related control. *Stem Cell Res* 53**,** 102374. doi: 10.1016/j.scr.2021.102374.

Vanlander, A.V., Menten, B., Smet, J., De Meirleir, L., Sante, T., De Paepe, B., et al. (2015). Two siblings with homozygous pathogenic splice-site variant in mitochondrial asparaginyl-tRNA synthetase (NARS2). *Hum Mutat* 36(2)**,** 222-231. doi: 10.1002/humu.22728.

Vantroys, E., Larson, A., Friederich, M., Knight, K., Swanson, M.A., Powell, C.A., et al. (2017). New insights into the phenotype of FARS2 deficiency. *Mol Genet Metab* 122(4)**,** 172-181. doi: 10.1016/j.ymgme.2017.10.004.

Vantroys, E., Smet, J., Vanlander, A.V., Vergult, S., De Bruyne, R., Roels, F., et al. (2018). Severe hepatopathy and neurological deterioration after start of valproate treatment in a 6-year-old child with mitochondrial tryptophanyl-tRNA synthetase deficiency. *Orphanet J Rare Dis* 13(1)**,** 80. doi: 10.1186/s13023-018-0822-6.

Vernon, H.J., McClellan, R., Batista, D.A., and Naidu, S. (2015). Mutations in FARS2 and non-fatal mitochondrial dysfunction in two siblings. *Am J Med Genet A* 167a(5)**,** 1147-1151. doi: 10.1002/ajmg.a.36993.

Ville, D., Lesca, G., Labalme, A., Portes, V.D., Arzimanoglou, A., and de Bellescize, J. (2020). Early-onset epileptic encephalopathy with migrating focal seizures associated with a FARS2 homozygous nonsense variant. *Epileptic Disord* 22(3)**,** 327-335. doi: 10.1684/epd.2020.1168.

Virdee, M., Swarnalingam, E., Kozenko, M., Tarnopolsky, M., and Jones, K. (2019). Expanding the Phenotype: Neurodevelopmental Disorder, Mitochondrial, With Abnormal Movements and Lactic Acidosis, With or Without Seizures (NEMMLAS) due to WARS2 Biallelic Variants, Encoding Mitochondrial Tryptophanyl-tRNA Synthase. *J Child Neurol* 34(12)**,** 778-781. doi: 10.1177/0883073819854604.

Vona, B., Maroofian, R., Bellacchio, E., Najafi, M., Thompson, K., Alahmad, A., et al. (2018). Expanding the clinical phenotype of IARS2-related mitochondrial disease. *BMC Med Genet* 19(1)**,** 196. doi: 10.1186/s12881-018-0709-3.

Waldron, A., Wilcox, C., Francklyn, C., and Ebert, A. (2019). Knock-Down of Histidyl-tRNA Synthetase Causes Cell Cycle Arrest and Apoptosis of Neuronal Progenitor Cells in vivo. *Front Cell Dev Biol* 7**,** 67. doi: 10.3389/fcell.2019.00067.

Walker, M.A., Mohler, K.P., Hopkins, K.W., Oakley, D.H., Sweetser, D.A., Ibba, M., et al. (2016). Novel Compound Heterozygous Mutations Expand the Recognized Phenotypes of FARS2-Linked Disease. *J Child Neurol* 31(9)**,** 1127-1137. doi: 10.1177/0883073816643402.

Wang, F., Huang, G.D., Tian, H., Zhong, Y.B., Shi, H.J., Li, Z., et al. (2015). Point mutations in KAL1 and the mitochondrial gene MT-tRNA(cys) synergize to produce Kallmann syndrome phenotype. *Sci Rep* 5**,** 13050. doi: 10.1038/srep13050.

Wang, J.Y., Chen, S.F., Zhang, H.Q., Wang, M.Y., Zhu, J.H., and Zhang, X. (2019). A homozygous mutation of alanyl-transfer RNA synthetase 2 in a patient of adult-onset leukodystrophy: A case report and literature review. *Brain Behav* 9(7)**,** e01313. doi: 10.1002/brb3.1313.

Wang, M., Sips, P., Khin, E., Rotival, M., Sun, X., Ahmed, R., et al. (2016). Wars2 is a determinant of angiogenesis. *Nat Commun* 7**,** 12061. doi: 10.1038/ncomms12061.

Webb, B.D., Wheeler, P.G., Hagen, J.J., Cohen, N., Linderman, M.D., Diaz, G.A., et al. (2015). Novel, compound heterozygous, single-nucleotide variants in MARS2 associated with developmental delay, poor growth, and sensorineural hearing loss. *Hum Mutat* 36(6)**,** 587-592. doi: 10.1002/humu.22781.

Wongkittichote, P., Magistrati, M., Shimony, J.S., Smyser, C.D., Fatemi, S.A., Fine, A.S., et al. (2022). Functional analysis of missense DARS2 variants in siblings with leukoencephalopathy with brain stem and spinal cord involvement and lactate elevation. *Mol Genet Metab* 136(4)**,** 260-267. doi: 10.1016/j.ymgme.2022.07.002.

Wortmann, S.B., Timal, S., Venselaar, H., Wintjes, L.T., Kopajtich, R., Feichtinger, R.G., et al. (2017). Biallelic variants in WARS2 encoding mitochondrial tryptophanyl-tRNA synthase in six individuals with mitochondrial encephalopathy. *Hum Mutat* 38(12)**,** 1786-1795. doi: 10.1002/humu.23340.

Wu, X.H., Lin, S.Z., Zhou, Y.Q., Wang, W.Q., Li, J.Y., and Chen, Q.D. (2022). VARS2 gene mutation leading to overall developmental delay in a child with epilepsy: A case report. *World J Clin Cases* 10(24)**,** 8749-8754. doi: 10.12998/wjcc.v10.i24.8749.

Xu, P., Wang, L., Peng, H., Liu, H., Liu, H., Yuan, Q., et al. (2021). Disruption of Hars2 in Cochlear Hair Cells Causes Progressive Mitochondrial Dysfunction and Hearing Loss in Mice. *Front Cell Neurosci* 15**,** 804345. doi: 10.3389/fncel.2021.804345.

Xu, Y., Wu, B.B., Wang, H.J., Zhou, S.Z., Cheng, G.Q., and Zhou, Y.F. (2020). A term neonate with early myoclonic encephalopathy caused by RARS2 gene variants: a case report. *Transl Pediatr* 9(5)**,** 707-712. doi: 10.21037/tp-20-110.

Yagasaki, H., Sano, F., Narusawa, H., Watanabe, D., Kaga, Y., Kobayashi, K., et al. (2022). Compound heterozygous variants of the NARS2 gene in siblings with developmental delay, epilepsy, and neonatal diabetes syndrome. *Am J Med Genet A* 188(8)**,** 2466-2471. doi: 10.1002/ajmg.a.62873.

Yahia, A., Elsayed, L., Babai, A., Salih, M.A., El-Sadig, S.M., Amin, M., et al. (2018). Intra-familial phenotypic heterogeneity in a Sudanese family with DARS2-related leukoencephalopathy, brainstem and spinal cord involvement and lactate elevation: a case report. *BMC Neurol* 18(1)**,** 175. doi: 10.1186/s12883-018-1180-7.

Yamashita, S., Miyake, N., Matsumoto, N., Osaka, H., Iai, M., Aida, N., et al. (2013). Neuropathology of leukoencephalopathy with brainstem and spinal cord involvement and high lactate caused by a homozygous mutation of DARS2. *Brain Dev* 35(4)**,** 312-316. doi: 10.1016/j.braindev.2012.05.007.

Yang, F., Wang, D., Zhang, X., Fan, H., Zheng, Y., Xiao, Z., et al. (2022a). Novel variants of seryl-tRNA synthetase resulting in HUPRA syndrome featured in pulmonary hypertension. *Front Cardiovasc Med* 9**,** 1058569. doi: 10.3389/fcvm.2022.1058569.

Yang, Y., Liu, W., Fang, Z., Shi, J., Che, F., He, C., et al. (2016). A Newly Identified Missense Mutation in FARS2 Causes Autosomal-Recessive Spastic Paraplegia. *Hum Mutat* 37(2)**,** 165-169. doi: 10.1002/humu.22930.

Yang, Z., Cao, J., Song, Y., Li, S., Jiao, Z., Ren, S., et al. (2022b). Whole-exome sequencing identified novel variants in three Chinese Leigh syndrome pedigrees. *Am J Med Genet A* 188(4)**,** 1214-1225. doi: 10.1002/ajmg.a.62641.

Yazici Gencdal, I., Dincer, A., Obuz, O., and Yapici, Z. (2020). Leukoencephalopathy With Brain Stem and Spinal Cord Involvement and Lactate Elevation (LBSL): A Case With Long-term Follow-up. *Neurologist* 25(5)**,** 144-147. doi: 10.1097/nrl.0000000000000286.

Yelam, A., Nagarajan, E., Chuquilin, M., and Govindarajan, R. (2019). Leucoencephalopathy with brain stem and spinal cord involvement and lactate elevation: a novel mutation in the DARS2 gene. *BMJ Case Rep* 12(1). doi: 10.1136/bcr-2018-227755.

Yin, X., Tang, B., Mao, X., Peng, J., Zeng, S., Wang, Y., et al. (2018). The genotypic and phenotypic spectrum of PARS2-related infantile-onset encephalopathy. *J Hum Genet* 63(9)**,** 971-980. doi: 10.1038/s10038-018-0478-z.

Yu, J., Jiang, W., Cao, L., Na, X., and Yang, J. (2020). Two novel likely pathogenic variants of HARS2 identified in a Chinese family with sensorineural hearing loss. *Hereditas* 157(1)**,** 47. doi: 10.1186/s41065-020-00157-7.

Yu, T., Zhang, Y., Zheng, W.Q., Wu, S., Li, G., Zhang, Y., et al. (2022). Selective degradation of tRNASer(AGY) is the primary driver for mitochondrial seryl-tRNA synthetase-related disease. *Nucleic Acids Res*. doi: 10.1093/nar/gkac1028.

Zhang, J., Zhang, Z., Zhang, Y., and Wu, Y. (2018). Distinct magnetic resonance imaging features in a patient with novel RARS2 mutations: A case report and review of the literature. *Exp Ther Med* 15(1)**,** 1099-1104. doi: 10.3892/etm.2017.5491.

Zhang, Y., Yu, Y., Zhao, X., Xu, Y., Chen, L., Li, N., et al. (2022). Novel RARS2 Variants: Updating the Diagnosis and Pathogenesis of Pontocerebellar Hypoplasia Type 6. *Pediatr Neurol* 131**,** 30-41. doi: 10.1016/j.pediatrneurol.2022.04.002.

Zheng, T., Luo, Q., Han, C., Zhou, J., Gong, J., Chun, L., et al. (2022a). Cytoplasmic and mitochondrial aminoacyl-tRNA synthetases differentially regulate lifespan in Caenorhabditis elegans. *iScience* 25(11)**,** 105266. doi: 10.1016/j.isci.2022.105266.

Zheng, W.Q., Pedersen, S.V., Thompson, K., Bellacchio, E., French, C.E., Munro, B., et al. (2022b). Elucidating the molecular mechanisms associated with TARS2-related mitochondrial disease. *Hum Mol Genet* 31(4)**,** 523-534. doi: 10.1093/hmg/ddab257.

Zhou, Y., Chen, B., Li, L., Pan, H., Liu, B., Li, T., et al. (2019). Novel alanyl-tRNA synthetase 2 (AARS2) homozygous mutation in a consanguineous Chinese family with premature ovarian insufficiency. *Fertil Steril* 112(3)**,** 569-576.e562. doi: 10.1016/j.fertnstert.2019.05.005.

Zhou, Y., Zhong, C., Yang, Q., Zhang, G., Yang, H., Li, Q., et al. (2021). Novel SARS2 variants identified in a Chinese girl with HUPRA syndrome. *Mol Genet Genomic Med* 9(4)**,** e1650. doi: 10.1002/mgg3.1650.

Zou, S., Mei, X., Yang, W., Zhu, R., Yang, T., and Hu, H. (2020). Whole-exome sequencing identifies rare pathogenic and candidate variants in sporadic Chinese Han deaf patients. *Clin Genet* 97(2)**,** 352-356. doi: 10.1111/cge.13638.
